# Supplementary material for: A tripodal imine-derived Fe(iii) complex for the fluorescence recognition of Mg(ii) via green emission: crystal structure, photophysical interactions and DFT studies
Source: Royal Society of Chemistry journal article supplement (doi:10.1039/d3nj01934a), 2023-01-01
Supplement: d3nj01934a1.pdf [file d3nj01934a1.pdf]

## Electronic Supplementary Information

### A tripodal imine derived Fe(III) complex for fluorescence recognition of Mg(II) via green emission: crystal structure, photo-physical interactions and DFT studies

Jayanta Das, Sangita Maji, Prasenjit Mandal, Subhasis Ghosh and Debasis Das\*

*Department of Chemistry, The University of Burdwan, Burdwan, 713104, W.B., India*

*Correspondence: D Das: ddas100in@yahoo.com*

#### 1. Experimental

##### Apparatus and reagents

Details about reagents and apparatus used in this report have been described here. HEPES buffer, tris-(2-aminoethyl)amine, 3-ethoxysalicylaldehyde,  $\text{FeSO}_4 \cdot 7\text{H}_2\text{O}$ ,  $\text{MgCl}_2 \cdot 6\text{H}_2\text{O}$  are purchased from Merck (India). Solvents used are of spectroscopic grade and chemicals are of analytical reagent grade. UV-Vis. spectra are recorded using Shimadzu Multi Spec 2450 spectrophotometer. Prestige 21 CE Shimadzu FTIR spectrophotometer is used for recording FTIR spectra.  $^1\text{H}$  NMR spectra are recorded by Bruker Advance 400 (400 MHz) spectrometer. Chemical shift values are reported in terms of parts per million (ppm) and tetramethylsilane is used as reference. Multiplicity was depicted as: s (singlet), d (doublet), t (triplet), q (quartet), m (multiplet). Coupling constants are reported in Hertz (Hz). High resolution mass spectra were obtained on a Xevo G2S/Q-Toff. microTM spectrometer. Elemental analyses have been performed on a Perkin Elmer 2400 CHN analyzer. Hitachi F-4500 spectrofluorimeter is used to record steady state emission and excitation spectra. Time-resolved fluorescence lifetime data are collected using time-correlated single-photon counting spectrometer (IBH, UK,  $\lambda_{\text{ex}}$ , 348 nm), attached to an MCP-PMT detector. The data are plotted by modern technique using a software IBH DAS 6.2 data analysis. Measurement of solution pH have been performed using Systronics digital pH meter (model 335).

## 2. General method of UV-Vis and fluorescence titration

A cell of 1 cm path length is used for absorption and emission studies. To measure UV-Vis. and fluorescence data, stock solution of [Fe(III)-TNESAL] is prepared (20  $\mu\text{M}$ ) in DMF/H<sub>2</sub>O (3/1, v/v) HEPES (10 mM) buffer. Working solutions of [Fe(III)-TNESAL] and Mg<sup>2+</sup> (from MgCl<sub>2</sub>) are prepared from their respective stock solutions. Fluorescence data are collected using 5 nm x 5 nm slit width.

### 2. Job's plot from fluorescence experiment

A series of solutions have been prepared in such a way that the total concentration of Mg<sup>2+</sup> and [Fe(III)-TNESAL] remain constant (20  $\mu\text{M}$ ) in all the sets. The mole fraction (X) of [Fe(III)-TNESAL] is varied from 0.1 to 0.9. The emission intensity at 488 nm is plotted against mole fraction of [Fe(III)-TNESAL] in solution.

### 4. Calculation of detection limit

The detection limit (DL) is determined from the following equation:

$$DL = \frac{3\sigma}{S}$$

where  $\sigma$  is the standard deviation of the blank solution, S is the slope of the calibration curve. S = 403.2927

### 5. Determination of binding constant:

The replacement binding constant of [Fe(III)-TNESAL] for Mg<sup>2+</sup> is determined using the following equation.

$$\frac{F_{max} - F_{min}}{F_x - F_{min}} = 1 + \frac{1}{K[C]^n}$$

Where  $F_{min}$ ,  $F_x$ , and  $F_{max}$  are the emission intensities of Fe(III)-TNESAL in absence of analyte, at an intermediate analyte concentration, and at a concentration of complete interaction with

analyte respectively. **K** is the binding constant, **C** is the concentration of analyte and **n** is the number of analyte bound per probe molecule (here, **n** = 1). The value of **K** is calculated from the slope of the plot.

## 6. Calculation of quantum yield

Fluorescence quantum yield of the compound relative to anthracene, whose quantum yield is known ( $\Phi = 0.27$ ) in ethanol medium, is measured using the following equation.

$$\Phi_s = \Phi_r \frac{A_r F_s \eta_s^2}{A_s F_r \eta_r^2}$$

$F_s$  and  $F_r$  are relative integrated fluorescence intensities of sample and reference solution,  $\eta_s$  and  $\eta_r$  are the refractive index of corresponding solvents,  $A_s$  and  $A_r$  are their absorbance at the same excitation wavelength ( $\lambda_{ex} = 348$  nm for DMF-H<sub>2</sub>O media).

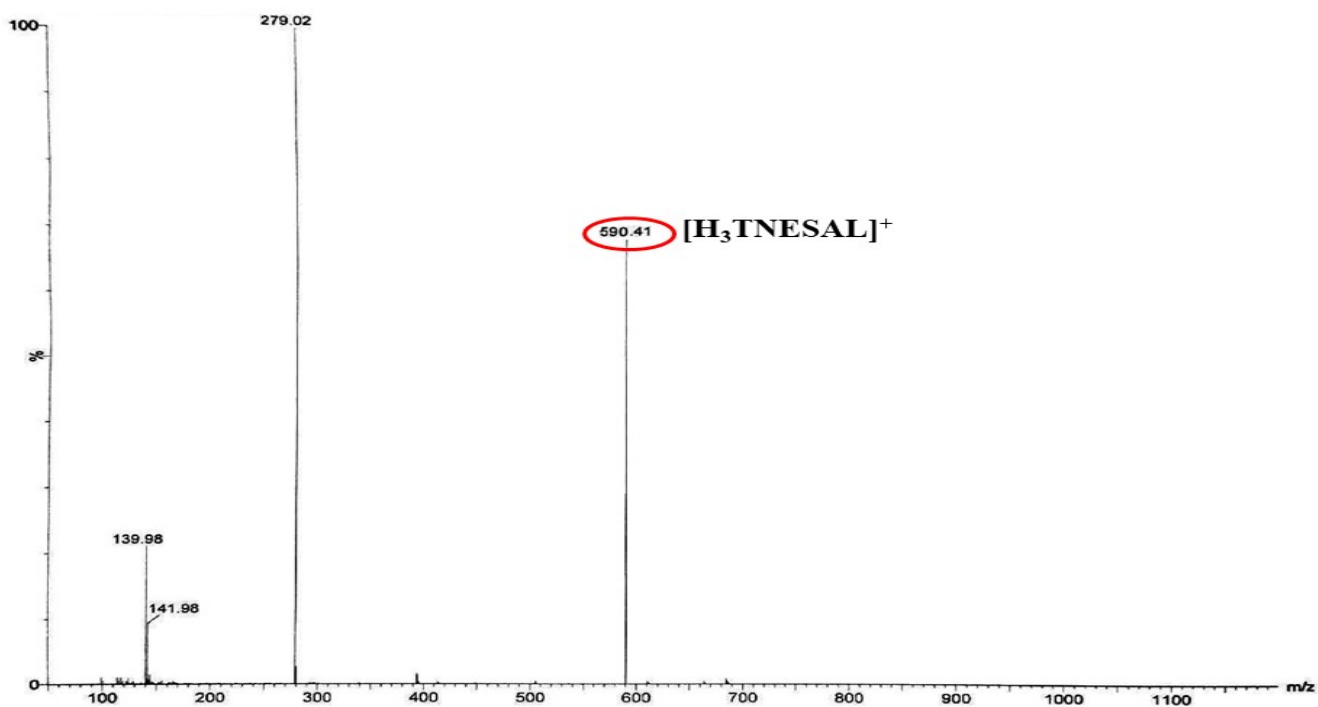

Fig. S1 Mass spectrum of H<sub>3</sub>TNESAL

DDJD-1 DMSO-D6 1D 1H 23/05/23

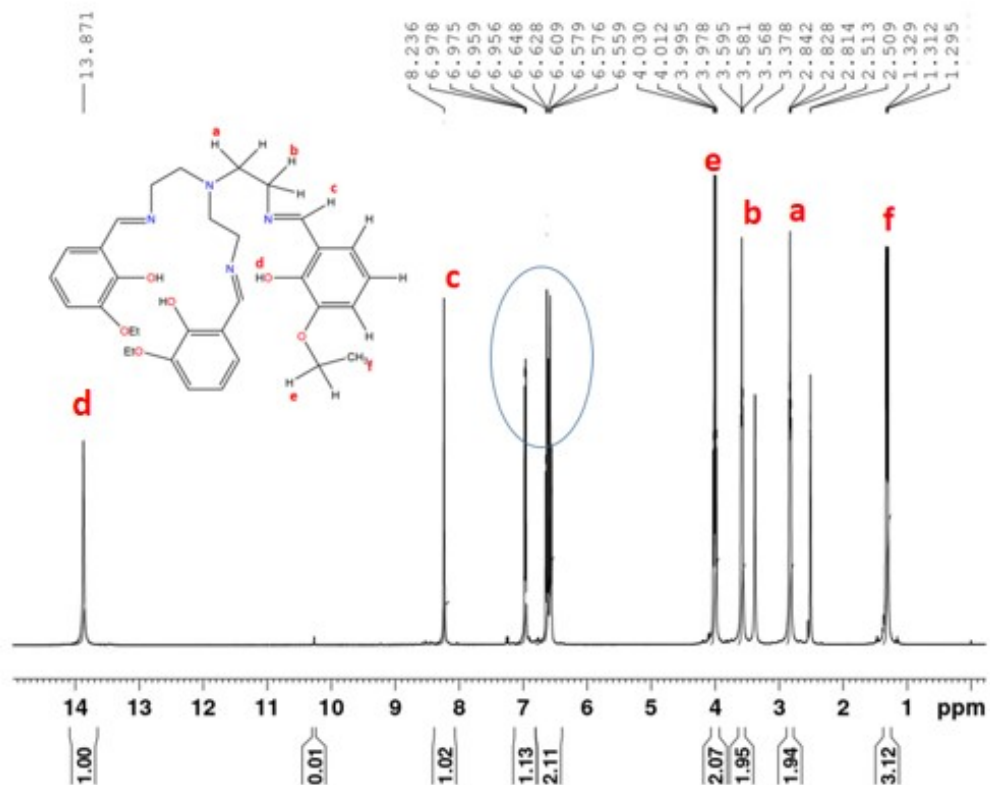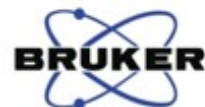

Current Data Parameters  
NAME BU\_DD  
EXPNO 21  
PROCNO 1

F2 - Acquisition Parameters  
Date\_ 20230523  
Time 12.10  
INSTRUM spect  
PROBHD 5 mm PABBO BB/  
PULPROG zg30  
TD 65536  
SOLVENT DMSO  
NS 32  
DS 4  
SWH 8223.685 Hz  
FIDRES 0.125483 Hz  
AQ 3.9845889 sec  
RG 67.59  
DN 60.800 usec  
DE 6.50 usec  
TE 289.4 K  
D1 1.00000000 sec  
TDO 1

===== CHANNEL f1 =====  
SFO1 400.1339906 MHz  
NUC1 1H  
P1 13.40 usec  
PLW1 15.00000000 W

F2 - Processing parameters  
SI 131072  
SF 400.1299996 MHz  
WDW EM  
SSB 0  
LB 0.10 Hz  
GB 0  
PC 1.00

Fig. S2a <sup>1</sup>H NMR spectrum of H<sub>3</sub>TNESAL in DMSO-d<sub>6</sub>

DDJD-1 DMSO-D6 1D 13C 23/05/23

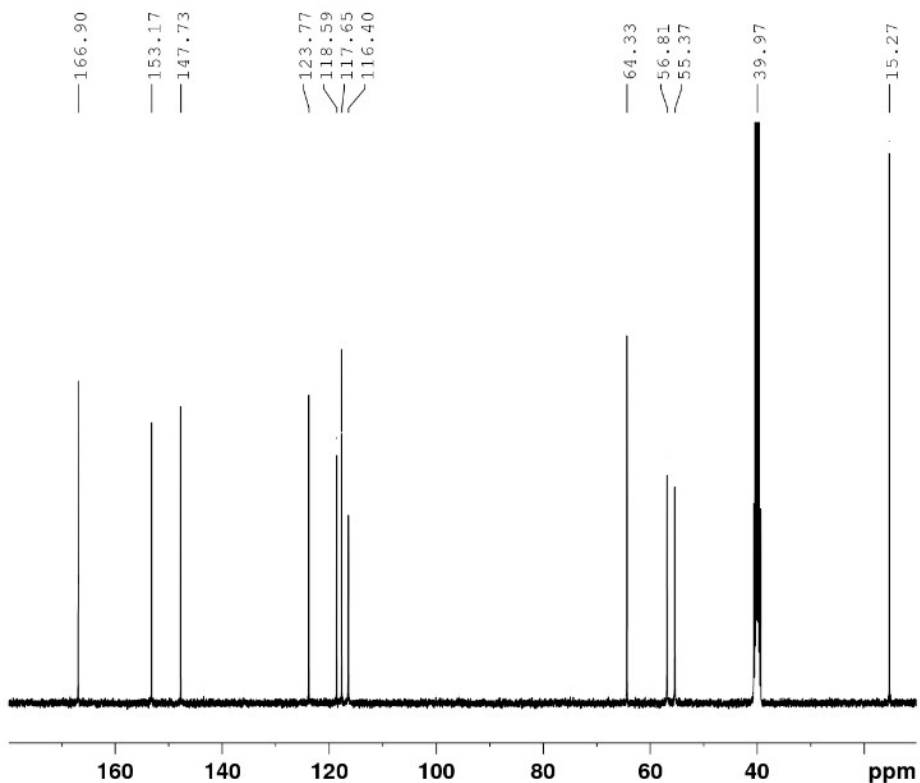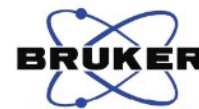

```
NAME          rg
EXPNO         BU_DD
PROCNO        22
              1

F2 - Acquisition Parameters
Date_         20230523
Time         12.28
INSTRUM      spect
PROBHD       5 mm PABBO BB/
PULPROG      zgpg30
TD           65536
SOLVENT      DMSO
NS           1024
DS           8
SWH          24038.461 Hz
FIDRES       0.366798 Hz
AQ           1.3631488 sec
RG           198.72
DW           20.800 usec
DE           6.50 usec
TE           290.7 K
D1           1.50000000 sec
D11          0.03000000 sec
TD0          1

===== CHANNEL f1 =====
SFO1         100.6228293 MHz
NUC1         13C
P1           10.00 usec
PLW1         60.00000000 W

===== CHANNEL f2 =====
SFO2         400.1324000 MHz
NUC2         1H
CPDPRG[2]   waltz16
PCPD2       90.00 usec
PLW2         15.00000000 W
PLW12        0.33252001 W
PLW13        0.26934001 W

F2 - Processing parameters
SI           131072
SF           100.6127690 MHz
WDW          EM
SSB          0
LB           1.00 Hz
GB           0
PC           1.40
```

Fig. S2b  $^{13}\text{C}$  NMR spectrum of  $\text{H}_3\text{TNESAL}$  in  $\text{DMSO-d}_6$

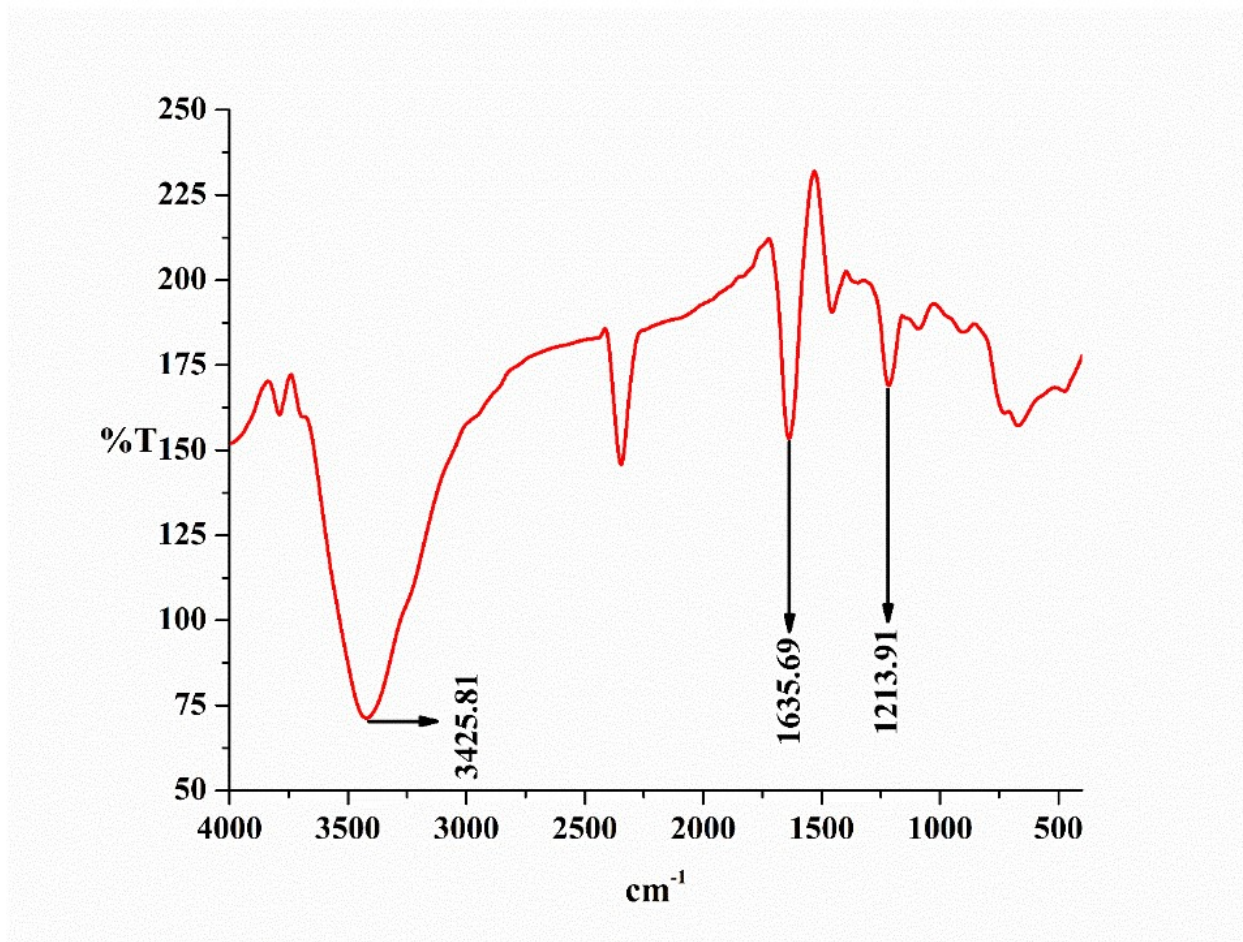

**Fig. S3** FTIR spectrum of H<sub>3</sub>TNESAL

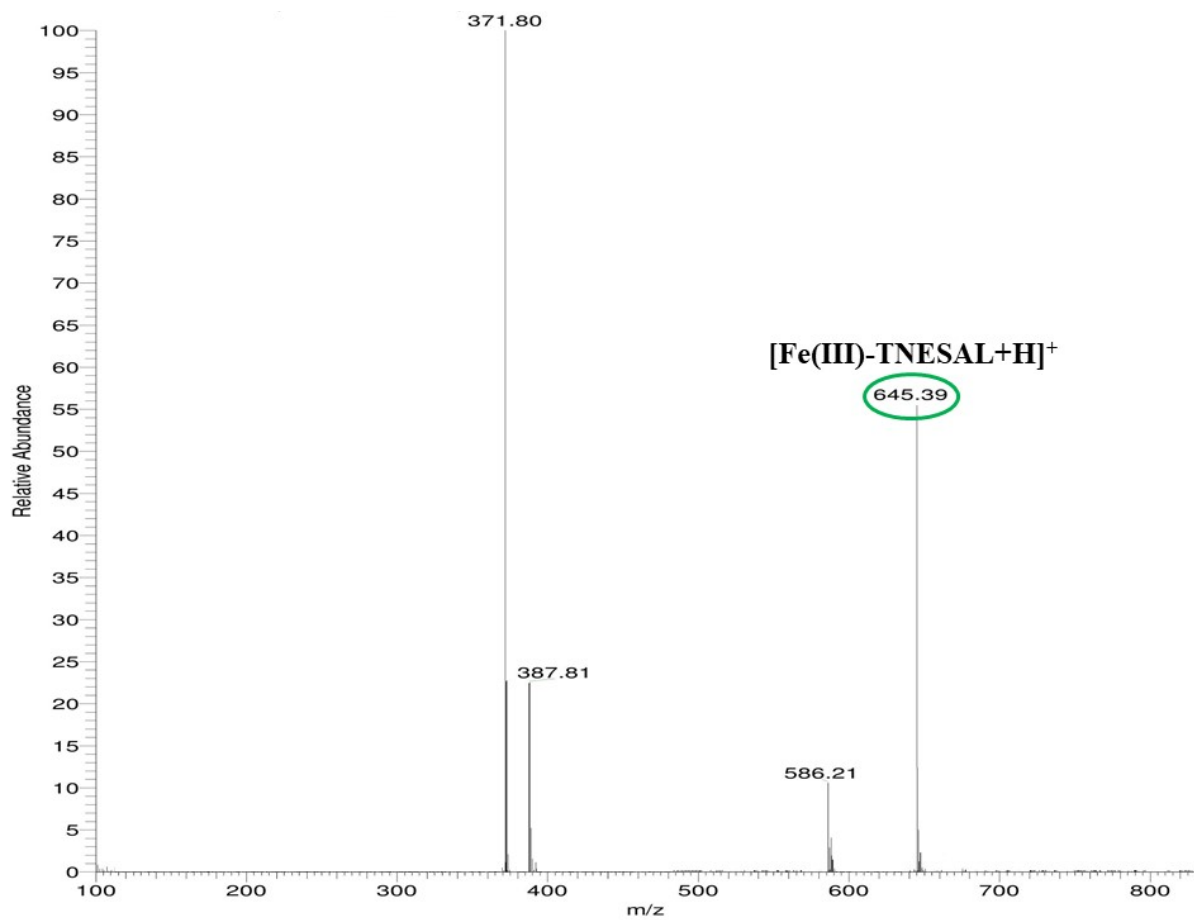

**Fig. S4** Mass spectrum of [Fe(III)-TNESAL] complex

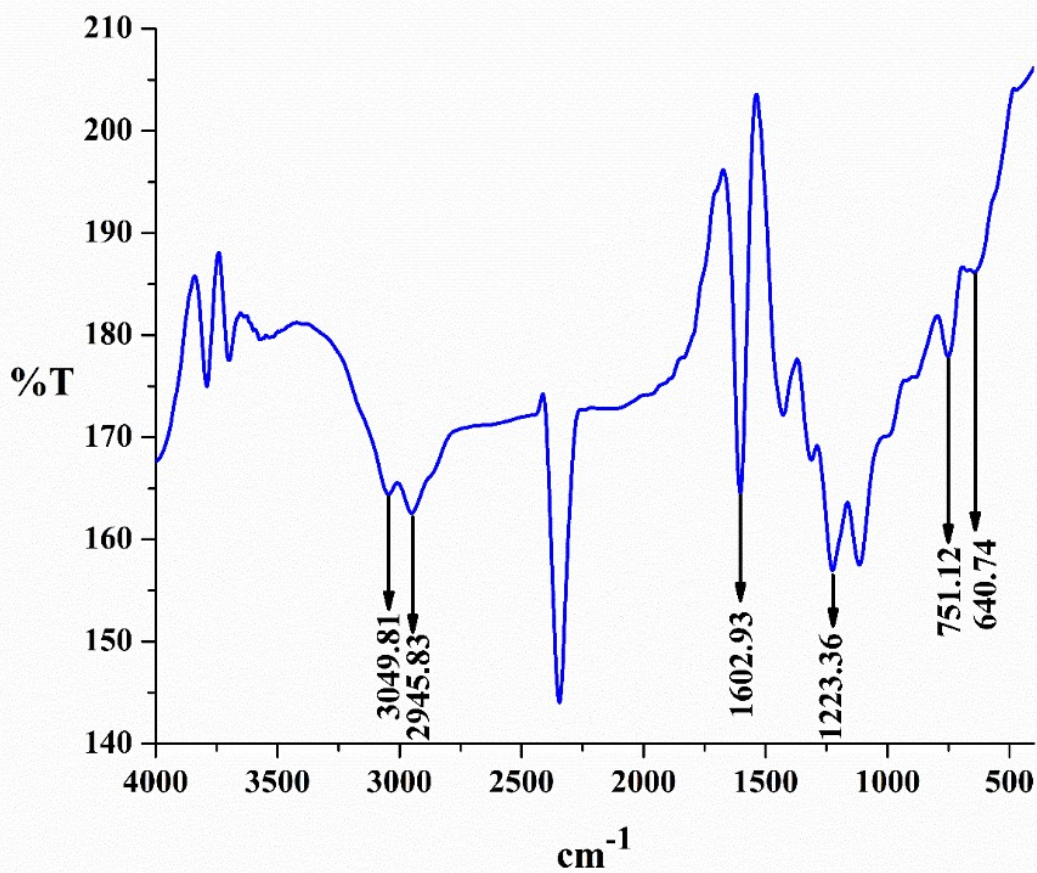

Fig. S5 FTIR spectrum of [Fe(III)-TNESAL] complex



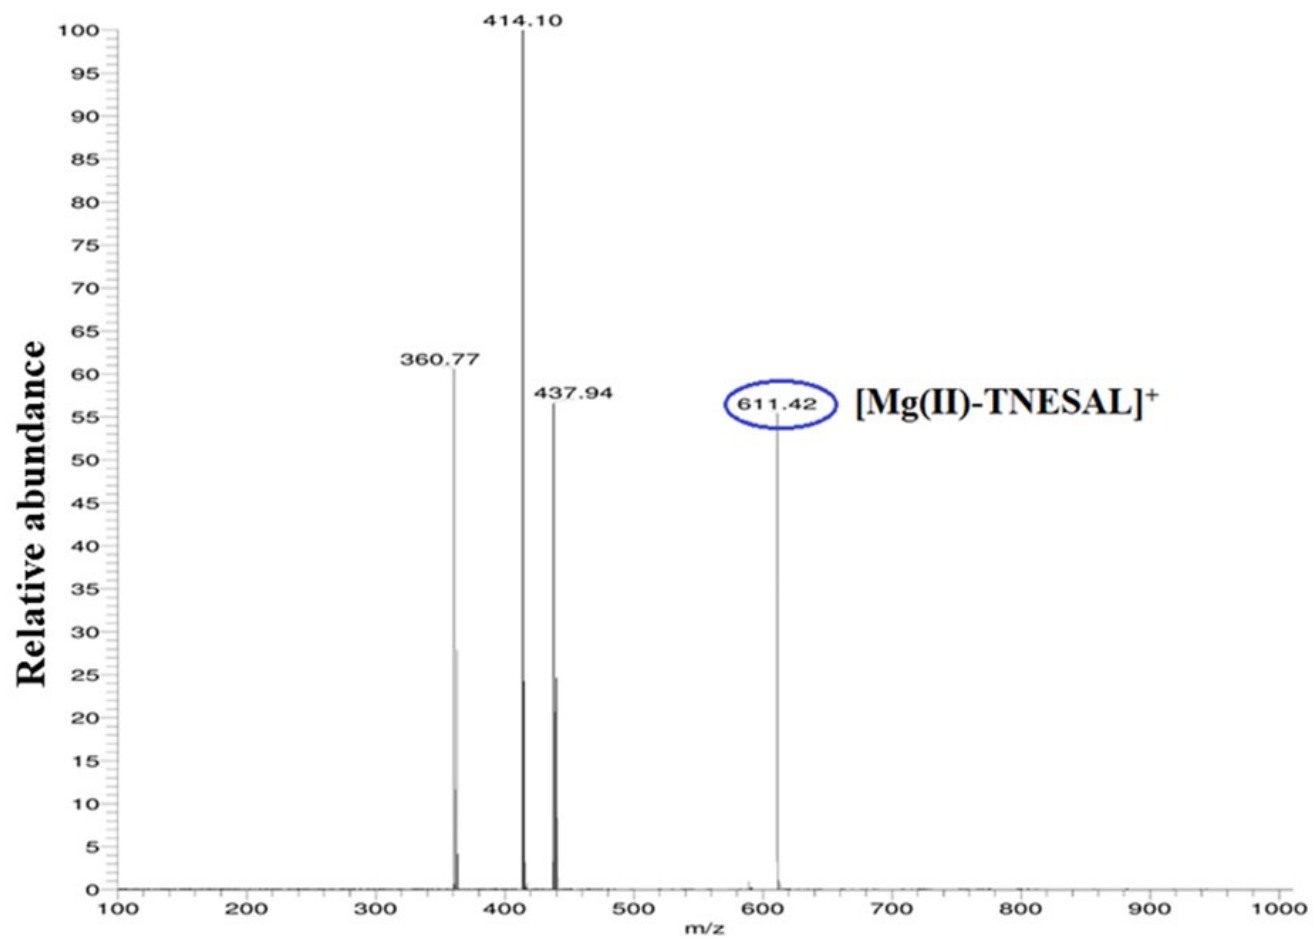

Fig. S6a Mass spectrum of [Mg(II)-TNESAL] complex

DDJD-3 DMSO-D6 1D 1H 23/05/23

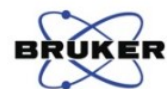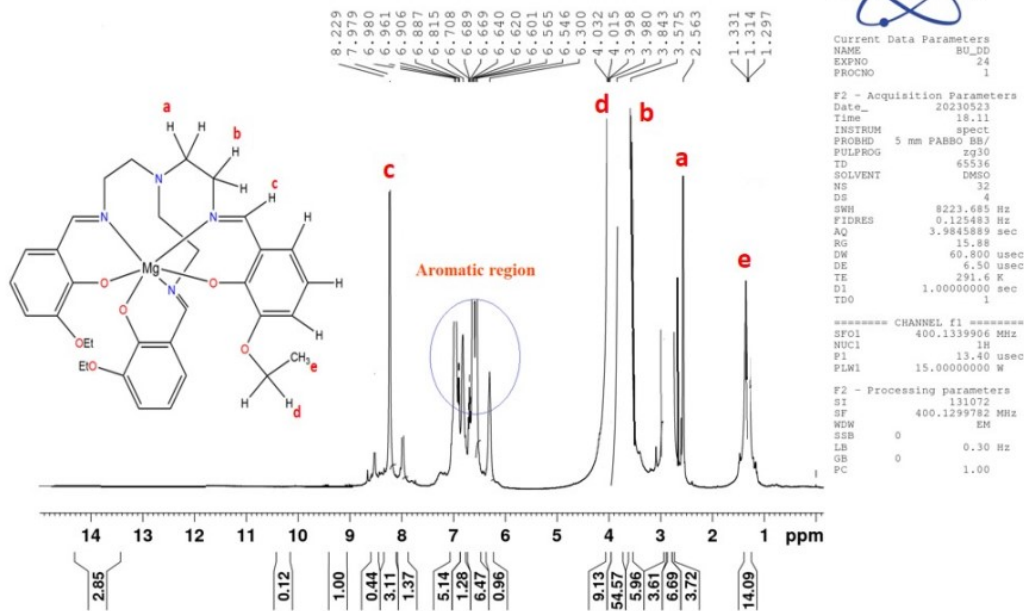

Fig. S6b <sup>1</sup>H NMR spectrum of [Mg(II)-TNESAL] in DMSO-d<sub>6</sub>

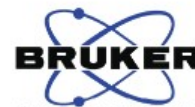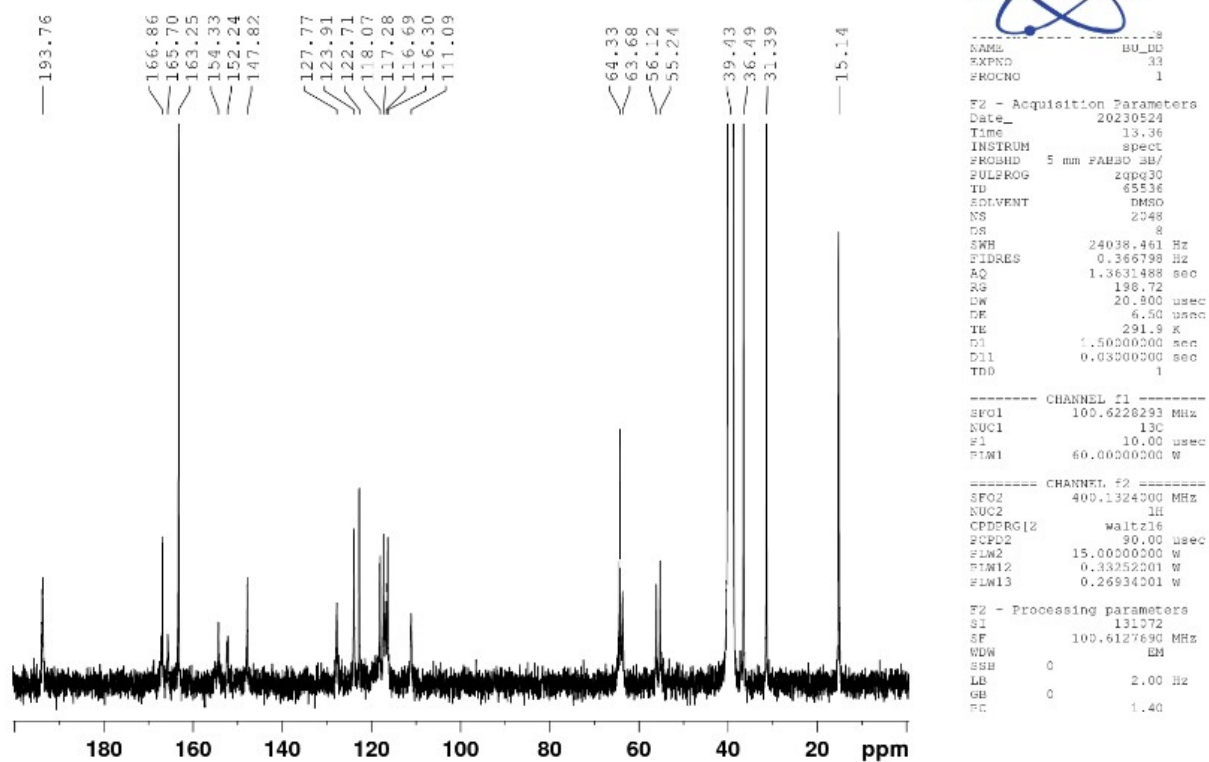

Fig. S6c  $^{13}\text{C}$  NMR spectrum of [Mg(II)-TNESAL] in DMSO- $d_6$

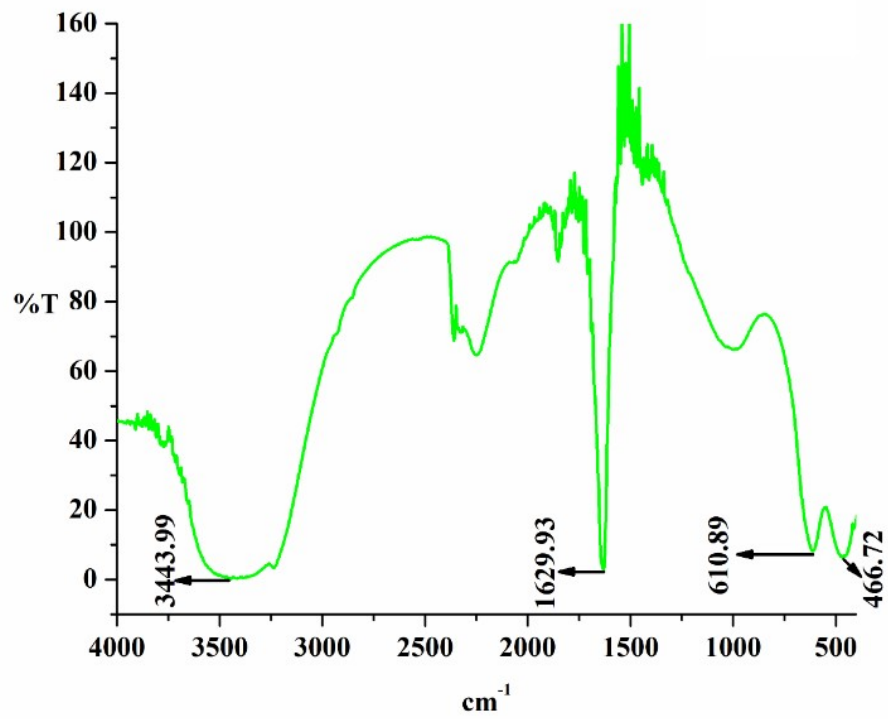

Fig. S7 FTIR spectrum of [Mg(II)-TNESAL] complex

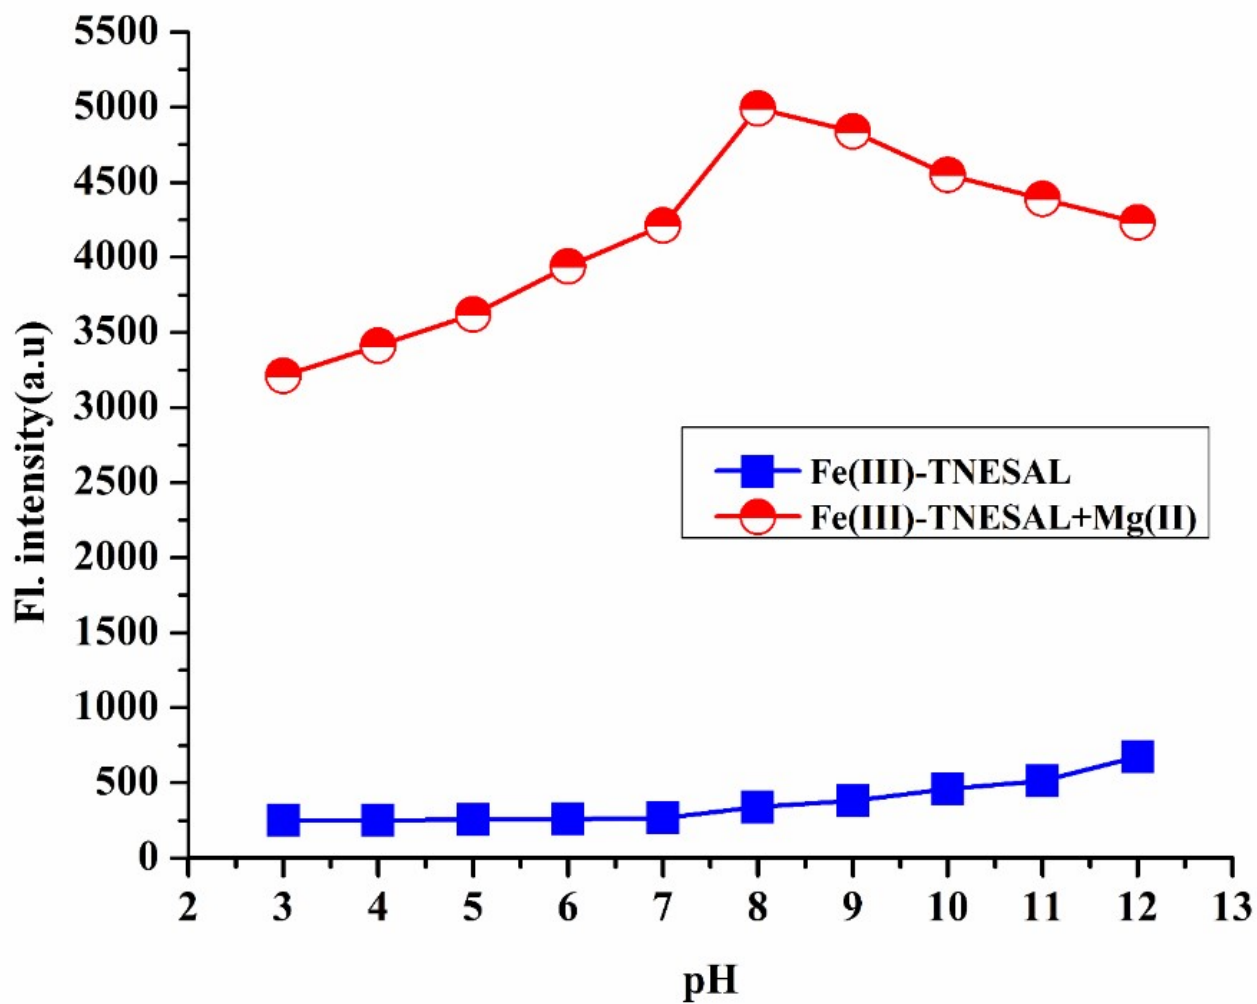

**Fig.S8** Influence of pH on the emission profile of [Fe(III)-TNESAL] (20  $\mu$ M, DMF/ H<sub>2</sub>O, 3:1, v/v,  $\lambda_{em}$ , 488 nm) in presence and absence of Mg<sup>2+</sup>

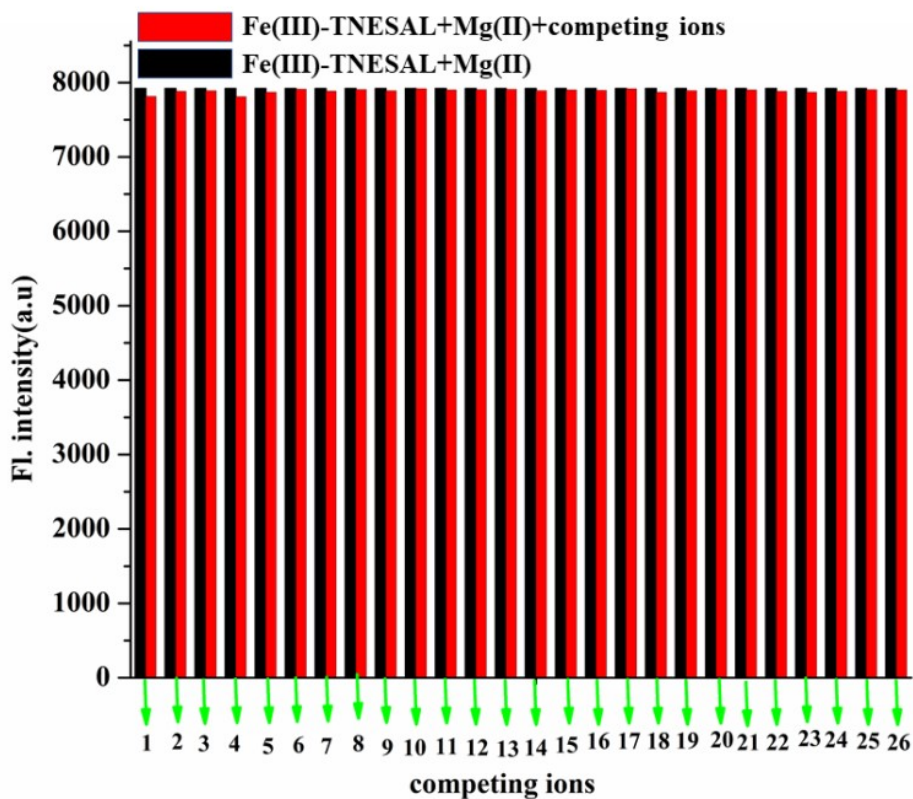

**Fig.S9** Emission intensity of [Fe(III)-TNESAL] (20  $\mu$ M) at 488 nm in presence of different ions (200  $\mu$ M) such as 1: V<sup>3+</sup>, 2: Cr<sup>3+</sup>, 3: Mn<sup>2+</sup>, 4: Co<sup>2+</sup>, 5: Ni<sup>2+</sup>, 6: Na<sup>+</sup>, 7: K<sup>+</sup>, 8: Li<sup>+</sup>, 9: Cl<sup>-</sup>, 10: Ca<sup>2+</sup>, 11: Al<sup>3+</sup>, 12: Sn<sup>2+</sup>, 13: Pd<sup>2+</sup>, 14: Pt<sup>4+</sup>, 15: Br<sup>-</sup>, 16: I<sup>-</sup>, 17: SO<sub>4</sub><sup>2-</sup>, 18: PO<sub>4</sub><sup>3-</sup>, 19: Fe<sup>3+</sup>, 20: Fe<sup>2+</sup>, 21: Hg<sup>2+</sup>, 22: Pb<sup>2+</sup>, 23: Cd<sup>2+</sup>, 24: Zn<sup>2+</sup>, 25: Cu<sup>2+</sup>, 26: Ag<sup>+</sup> in DMF/ H<sub>2</sub>O (3/1, v/v, 20  $\mu$ M,  $\lambda_{\text{ex}}$ , 348 nm)

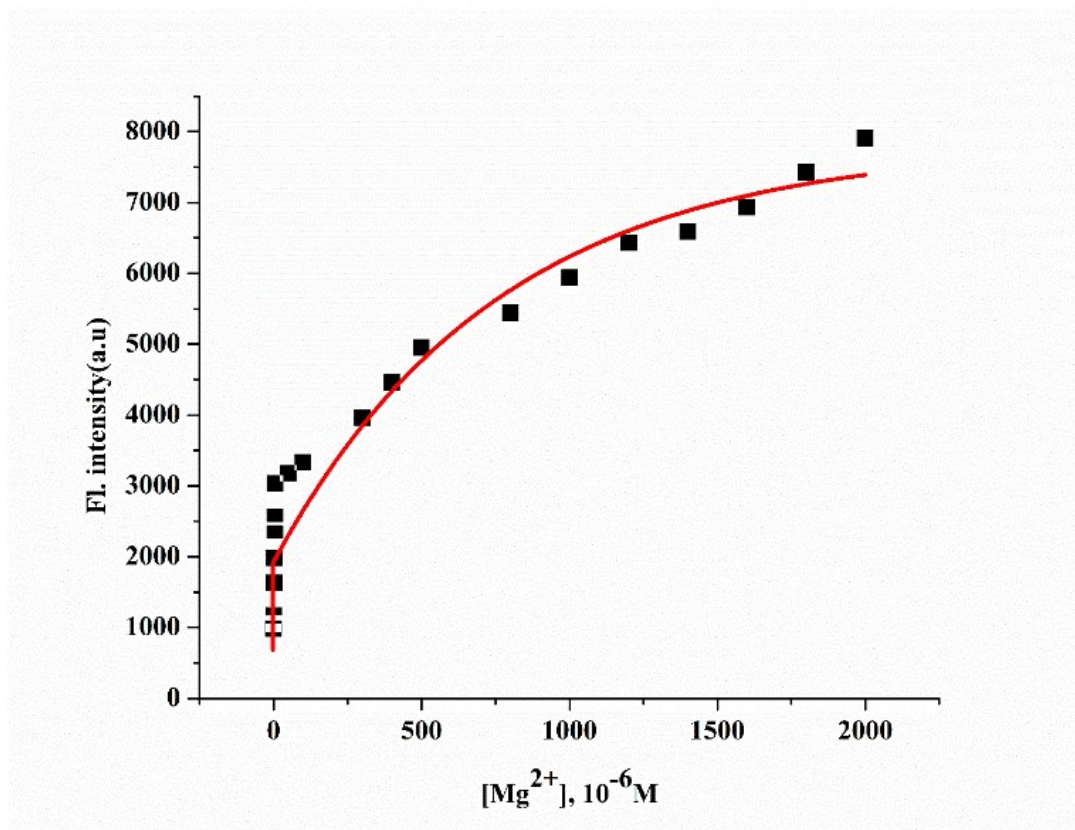

**Fig.S10** Plot of emission intensities of [Fe(III)-TNESAL] (20  $\mu\text{M}$ ) as a function of added  $\text{Mg}^{2+}$  (0-200  $\mu\text{M}$ ) at 488 nm ( $\lambda_{\text{ex}}$ , 348 nm).

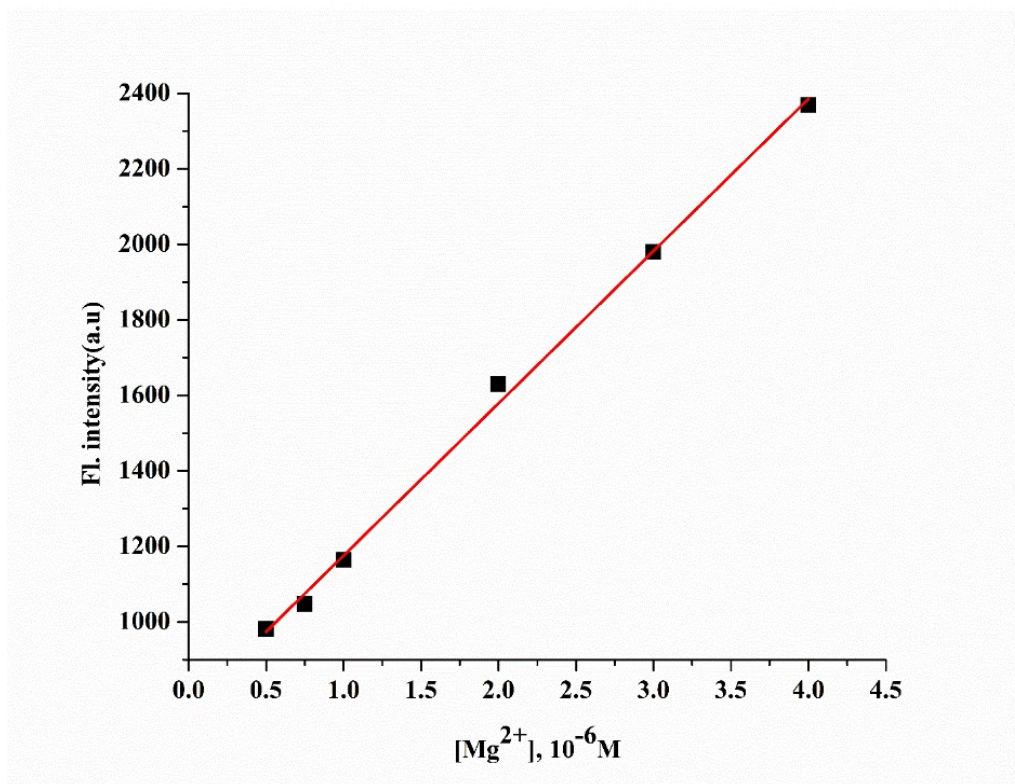

**Fig. S11** Linear region of Fig.S10



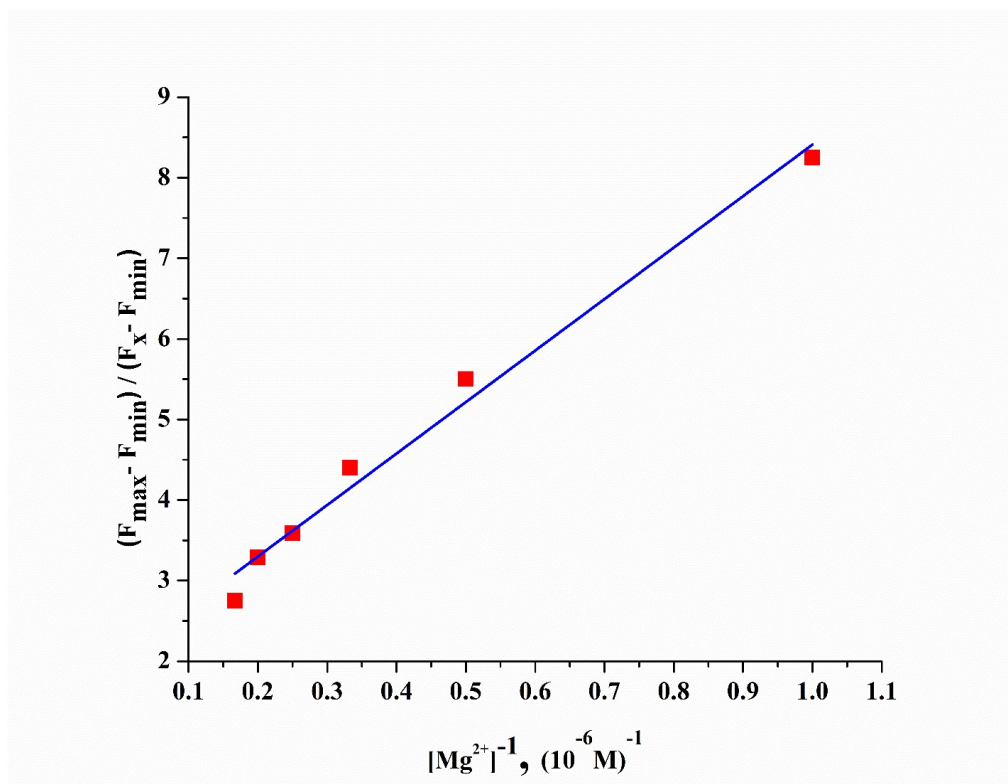

**Fig. S12** Determination of displacement binding constant of [Fe(III)-TNESAL] for  $\text{Mg}^{2+}$ .

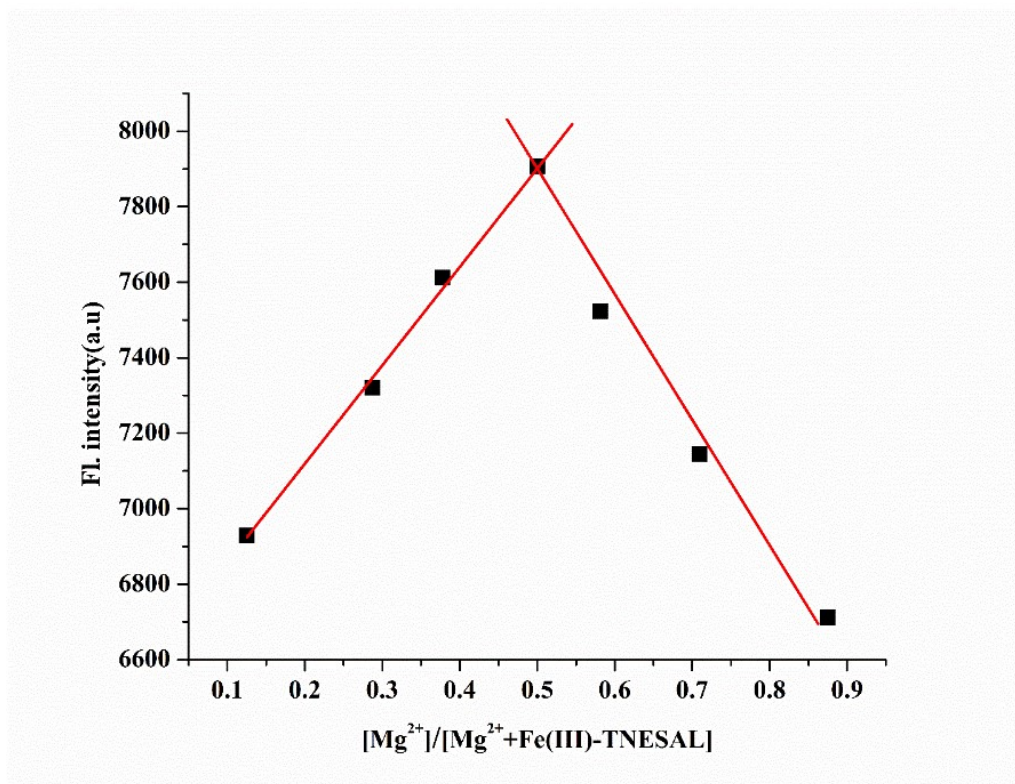

**Fig. S13** Job's plot for determination of stoichiometry of interaction between  $[Fe(III)\text{-TNESAL}]$  complex and  $Mg^{2+}$ .

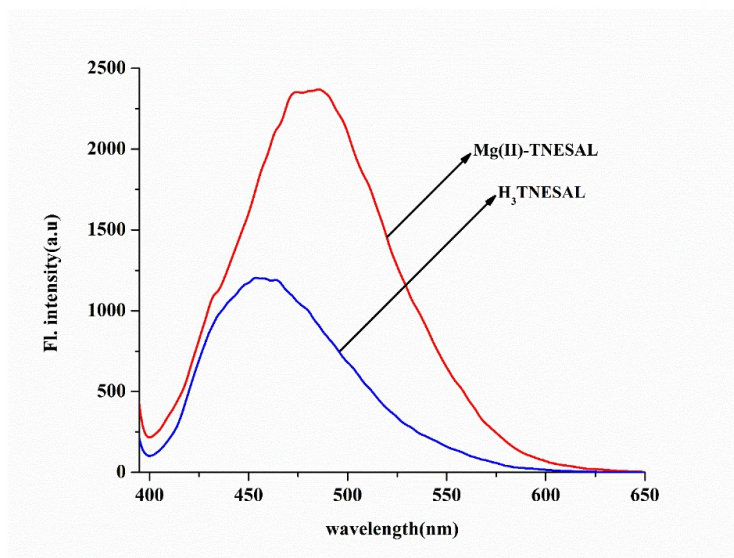

**Fig. S14** Emission spectra of  $[Mg(II)\text{-TNESAL}]$  complex ( $\lambda_{em}$ , 488 nm) and  $H_3\text{TNESAL}$  ( $\lambda_{em}$ , 454 nm)

**Table S1** Selected bond angles and lengths of [Fe(III)-TNESAL] complex

| <b>Atoms</b> | <b>Angle</b> | <b>Atoms</b> | <b>Distance</b> |
|--------------|--------------|--------------|-----------------|
| O1 Fe1 O2    | 93.01(6)     | Fe1 O1       | 1.9457(14)      |
| O1 Fe1 O3    | 93.03(6)     | Fe1 O2       | 1.9476(14)      |
| O2 Fe1 O3    | 92.81(6)     | Fe1 O3       | 1.9526(14)      |
| O1 Fe1 N1    | 177.13(6)    | Fe1 N1       | 2.1761(17)      |
| O2 Fe1 N1    | 86.21(6)     | Fe1 N4       | 2.1788(17)      |
| O3 Fe1 N1    | 84.25(6)     | Fe1 N3       | 2.1827(17)      |
| O1 Fe1 N4    | 84.23(6)     | C1 N2        | 1.447(3)        |
| O2 Fe1 N4    | 177.06(6)    | C1 C2        | 1.522(3)        |
| O3 Fe1 N4    | 86.33(6)     | O1 C31       | 1.305(2)        |
| N1 Fe1 N4    | 96.49(6)     | N1 C7        | 1.299(3)        |
| O1 Fe1 N3    | 86.22(6)     | N1 C6        | 1.478(3)        |
| O2 Fe1 N3    | 84.51(6)     | N2 C5        | 1.442(3)        |
| O3 Fe1 N3    | 177.17(6)    | N2 C3        | 1.442(3)        |
| N1 Fe1 N3    | 96.45(6)     | O2 C13       | 1.309(2)        |
| N4 Fe1 N3    | 96.30(6)     | C2 N3        | 1.480(3)        |
| N2 C1 C2     | 111.4(2)     | O3 C24       | 1.304(2)        |
| C31 O1 Fe1   | 133.80(13)   | C3 C4        | 1.518(3)        |
| C7 N1 C6     | 115.22(18)   | N3 C25       | 1.296(3)        |
| C7 N1 Fe1    | 123.73(14)   | N4 C16       | 1.290(3)        |
| C6 N1 Fe1    | 120.09(14)   | N4 C4        | 1.485(3)        |
| C5 N2 C3     | 118.0(2)     | O4 C30       | 1.373(3)        |
| C5 N2 C1     | 117.8(2)     | O4 C32       | 1.403(4)        |
| C3 N2 C1     | 117.5(2)     | O5 C21       | 1.373(3)        |
| C13 O2 Fe1   | 133.87(13)   | O5 C22       | 1.396(3)        |
| N3 C2 C1     | 109.37(19)   | C5 C6        | 1.522(3)        |
| C24 O3 Fe1   | 133.65(13)   | C9 C10       | 1.356(4)        |
| N2 C3 C4     | 111.6(2)     | C9 C8        | 1.409(3)        |
| C25 N3 C2    | 115.14(18)   | C8 C13       | 1.409(3)        |
| C25 N3 Fe1   | 123.67(14)   | C8 C7        | 1.442(3)        |
| C2 N3 Fe1    | 120.27(14)   | O6 C12       | 1.370(3)        |
| C16 N4 C4    | 115.35(19)   | O6 C14       | 1.396(4)        |
| C16 N4 Fe1   | 123.67(14)   | C10 C11      | 1.380(4)        |
| C4 N4 Fe1    | 120.05(14)   | C11 C12      | 1.391(4)        |
| C30 O4 C32   | 115.5(2)     | C12 C13      | 1.420(3)        |
| N4 C4 C3     | 109.40(19)   | C14 C15      | 1.464(5)        |
| C21 O5 C22   | 115.3(2)     | C16 C17      | 1.448(3)        |
| N2 C5 C6     | 111.8(2)     | C18 C19      | 1.361(4)        |
| C10 C9 C8    | 121.9(2)     | C18 C17      | 1.410(3)        |
| C13 C8 C9    | 119.8(2)     | C19 C20      | 1.382(4)        |
| C13 C8 C7    | 123.26(19)   | C20 C21      | 1.390(3)        |
| C9 C8 C7     | 116.9(2)     | C21 C24      | 1.425(3)        |
| N1 C7 C8     | 127.05(19)   | C22 C23      | 1.468(5)        |

|             |            |         |          |
|-------------|------------|---------|----------|
| C12 O6 C14  | 115.2(2)   | C24 C17 | 1.410(3) |
| N1 C6 C5    | 109.35(19) | C25 C26 | 1.439(3) |
| C9 C10 C11  | 119.3(2)   | C26 C31 | 1.411(3) |
| C10 C11 C12 | 121.0(2)   | C26 C27 | 1.415(3) |
| O6 C12 C11  | 118.6(2)   | C27 C28 | 1.354(4) |
| O6 C12 C13  | 120.4(2)   | C28 C29 | 1.385(4) |
| C11 C12 C13 | 120.7(2)   | C29 C30 | 1.391(3) |
| O2 C13 C8   | 123.50(18) | C30 C31 | 1.421(3) |
| O2 C13 C12  | 119.18(19) | C32 C33 | 1.463(5) |
| C8 C13 C12  | 117.27(19) |         |          |
| O6 C14 C15  | 111.6(3)   |         |          |
| N4 C16 C17  | 127.15(19) |         |          |
| C19 C18 C17 | 121.7(2)   |         |          |
| C18 C19 C20 | 119.5(2)   |         |          |
| C19 C20 C21 | 121.0(2)   |         |          |
| O5 C21 C20  | 118.7(2)   |         |          |
| O5 C21 C24  | 120.6(2)   |         |          |
| C20 C21 C24 | 120.5(2)   |         |          |
| O5 C22 C23  | 111.5(3)   |         |          |
| O3 C24 C17  | 123.54(18) |         |          |
| O3 C24 C21  | 118.95(19) |         |          |
| C17 C24 C21 | 117.47(19) |         |          |
| N3 C25 C26  | 126.96(19) |         |          |
| C31 C26 C27 | 120.0(2)   |         |          |
| C31 C26 C25 | 123.49(18) |         |          |
| C27 C26 C25 | 116.5(2)   |         |          |
| C28 C27 C26 | 121.5(2)   |         |          |
| C27 C28 C29 | 119.5(2)   |         |          |
| C28 C29 C30 | 121.1(2)   |         |          |
| O4 C30 C29  | 119.0(2)   |         |          |
| O4 C30 C31  | 120.2(2)   |         |          |
| C29 C30 C31 | 120.6(2)   |         |          |
| O1 C31 C26  | 123.51(17) |         |          |
| O1 C31 C30  | 119.14(19) |         |          |
| C26 C31 C30 | 117.29(19) |         |          |
| O4 C32 C33  | 111.5(3)   |         |          |
| C18 C17 C24 | 119.8(2)   |         |          |
| C18 C17 C16 | 116.9(2)   |         |          |
| C24 C17 C16 | 123.28(18) |         |          |



**Table S2** Comparison with pioneering Mg<sup>2+</sup> selective probes available in literature

| Sl No | Probe                                                                                                                                                                                                                                                                                | Media                                                                   | Sensing type | Mechanism                                                                                                          | LOD                        | Ref. |
|-------|--------------------------------------------------------------------------------------------------------------------------------------------------------------------------------------------------------------------------------------------------------------------------------------|-------------------------------------------------------------------------|--------------|--------------------------------------------------------------------------------------------------------------------|----------------------------|------|
| 1     | Ce <sub>2</sub> (C <sub>17</sub> H <sub>14</sub> N <sub>4</sub> O <sub>4</sub> ) <sub>3</sub> ·3CH <sub>3</sub> OH·6H <sub>2</sub> O<br><br>Ce <sub>2</sub> (C <sub>25</sub> H <sub>18</sub> N <sub>4</sub> O <sub>4</sub> ) <sub>3</sub> ·3H <sub>2</sub> O·C<br>H <sub>3</sub> OH  | DMF-CH <sub>3</sub> CN (1 : 99, v/v)                                    | Turn on      | PET operates between amide unit and Ce <sup>3+</sup> chelated unit                                                 | -                          | 49   |
| 2     | Ce <sub>2</sub> (C <sub>30</sub> H <sub>24</sub> N <sub>4</sub> O <sub>6</sub> ) <sub>3</sub> ·3C <sub>3</sub> H <sub>7</sub> ON<br>Ce <sub>2</sub> (C <sub>48</sub> H <sub>40</sub> N <sub>4</sub> O <sub>6</sub> ) <sub>3</sub> NO <sub>3</sub> ·3C <sub>3</sub> H <sub>7</sub> ON | DMF-CH <sub>3</sub> CN (1 : 9, v/v)                                     | Turn on      | Impeding the PET processes                                                                                         | -                          | 50   |
| 3     | C <sub>102</sub> H <sub>65</sub> Eu <sub>4</sub> N <sub>9</sub> O <sub>46.5</sub>                                                                                                                                                                                                    | EtOH                                                                    | Turn on      | Donor-acceptor electron transfer                                                                                   | 1.53 × 10 <sup>-10</sup> M | 51   |
| 4     | C <sub>20</sub> H <sub>16</sub> N <sub>2</sub> O <sub>2</sub><br>C <sub>22</sub> H <sub>20</sub> N <sub>2</sub> O <sub>4</sub><br>C <sub>20</sub> H <sub>16</sub> N <sub>2</sub> O <sub>4</sub>                                                                                      | DMF                                                                     | Turn on      | Restriction of -CH=N isomerisation and enhanced rigidity                                                           | 10 <sup>-7</sup> M         | 52   |
| 5     | C <sub>19</sub> H <sub>17</sub> N <sub>2</sub> O <sub>5</sub>                                                                                                                                                                                                                        | DMSO/ H <sub>2</sub> O (7 : 3, v/v, 0.01 M HEPES, pH, 8.5)              | Turn on      | Inhibition of ESIPT                                                                                                | 9.2 × 10 <sup>-10</sup> M  | 53   |
| 6     | C <sub>18</sub> H <sub>14</sub> N <sub>2</sub> O <sub>2</sub>                                                                                                                                                                                                                        | CH <sub>3</sub> CN/H <sub>2</sub> O (9 : 1 v/v) in HEPES buffer, pH 7.2 | Turn on      | Complex formation between the probe and Mg <sup>2+</sup>                                                           | 2.04 nM                    | 54   |
| 7     | Fe <sub>3</sub> O <sub>4</sub> /RhB@Al-MOFs                                                                                                                                                                                                                                          | Water                                                                   | Turn on      | Energy transfer between Mg <sup>2+</sup> and Al-MOFs                                                               | 8×10 <sup>-7</sup> M       | 55   |
| 8     | C <sub>11</sub> H <sub>8</sub> O <sub>4</sub>                                                                                                                                                                                                                                        | CH <sub>3</sub> OH                                                      | Turn on      | Complex formation between the probe and Mg <sup>2+</sup>                                                           | 0.43 μM                    | 56   |
| 9     | C <sub>44</sub> H <sub>34</sub> N <sub>4</sub> O <sub>2</sub>                                                                                                                                                                                                                        | DMSO/ DMF/THF                                                           | Turn on      | Complex formation between the probe and Mg <sup>2+</sup>                                                           | 10 <sup>-6</sup> M         | 57   |
| 10    | C <sub>28</sub> H <sub>28</sub> N <sub>2</sub> O <sub>2</sub> S <sub>2</sub>                                                                                                                                                                                                         | H <sub>2</sub> O- DMF (9.9/ 0.1)                                        | Turn on      | Complex formation inhibits the PET process from nitrogen donor of the receptor to the naphthyl rings is restrained | 10 <sup>-8</sup> M         | 58   |
| 11    | C <sub>16</sub> H <sub>12</sub> N <sub>2</sub> O <sub>3</sub>                                                                                                                                                                                                                        | CH <sub>3</sub> CN/H <sub>2</sub> O (8:2, v/v)                          | Turn on      | Due to complex formation                                                                                           | 0.09 μM                    | 59   |
| 12    | C <sub>7</sub> H <sub>4</sub> Cl <sub>2</sub> O <sub>2</sub>                                                                                                                                                                                                                         | Ethanol-HEPES buffer (95:5, v/v, 0.05 M, pH, 7.0)                       | Turn on      | CHEF                                                                                                               | 2.89×10 <sup>-7</sup> M    | 60   |
| 13    | Tryptophan functionalized AuNPs                                                                                                                                                                                                                                                      | Aqueous                                                                 | Turn on      | Complex formation                                                                                                  | 0.2 μmol L <sup>-1</sup>   | 61   |
| 14    | MagFRET-1 (Genetically Encoded)                                                                                                                                                                                                                                                      | 150 mM HEPES (pH 7.1), 100 mM                                           | Turn on      | Ligand-induced folding of intrinsically-                                                                           | -                          | 62   |

|    |                                                                                                                                    |                                                                              |         |                                                                                 |                                                          |                              |
|----|------------------------------------------------------------------------------------------------------------------------------------|------------------------------------------------------------------------------|---------|---------------------------------------------------------------------------------|----------------------------------------------------------|------------------------------|
|    |                                                                                                                                    | NaCl, 10% (v/v)<br>glycerol                                                  |         | disordered proteins                                                             |                                                          |                              |
| 15 | C <sub>21</sub> H <sub>17</sub> N <sub>4</sub> O <sub>3</sub>                                                                      | HEPES buffered<br>CH <sub>3</sub> CN/H <sub>2</sub> O (8:2,<br>v/v, pH, 7.0) | Turn on | Formation of a 1:1 host/<br>guest complex                                       | 3.2-100 μM                                               | 63                           |
| 16 | C <sub>22</sub> H <sub>22</sub> N <sub>2</sub> O <sub>4</sub>                                                                      | MeOH-H <sub>2</sub> O                                                        | Turn on | Arresting -CH=N bond<br>isomerization and<br>inhibition of the ESIPT<br>process | -                                                        | 64                           |
| 17 | C <sub>37</sub> H <sub>34</sub> N <sub>4</sub> O <sub>3</sub>                                                                      | CH <sub>3</sub> CN                                                           | Turn on | Formation of 1:1 ligand-<br>metal complexes and<br>inhibition PET process       | 1.44×10 <sup>-6</sup> M                                  | 65                           |
| 18 | N-doped carbon<br>dots (NCDs) using 4-<br>hydroxybenzaldehyde and<br>1, 2, 4, 5-benzenetetramine<br>tetrahydrochloride             | Aqueous                                                                      | Turn on | Chelation                                                                       | 60 μM                                                    | 66                           |
| 19 | C <sub>22</sub> H <sub>13</sub> ON <sub>5</sub>                                                                                    | EtOH                                                                         | Turn on | CHEF                                                                            | 3.3×10 <sup>-8</sup> M                                   | 67                           |
| 20 | C <sub>16</sub> H <sub>10</sub> N <sub>2</sub> OS                                                                                  | DMSO-HEPES<br>buffer (pH = 7.0,<br>9:1 (v/v))                                | Turn on | CHEF                                                                            | 0.142 μM                                                 | 68                           |
| 21 | C <sub>15</sub> H <sub>9</sub> N <sub>3</sub> O <sub>6</sub> and<br>C <sub>15</sub> H <sub>9</sub> BrN <sub>2</sub> O <sub>4</sub> | CH <sub>3</sub> CN                                                           | Turn on | LMCT                                                                            | 2.56 × 10 <sup>-6</sup> and<br>1.28 × 10 <sup>-6</sup> M | 69                           |
| 22 | C <sub>33</sub> H <sub>39</sub> FeN <sub>4</sub> O <sub>6</sub>                                                                    | DMF-water, (3 : 1,<br>v/v, 1 M HEPES<br>buffer, pH 8.1)                      | Turn on | Metal ion displacement                                                          | 7.66×10 <sup>-9</sup> M                                  | <b>Pres<br/>ent<br/>work</b> |
